# Supplementary material for: Self-assembly of hierarchical Fe3O4microsphere/graphene nanosheet composite: towards a promising high-performance anode for Li-ion batteries
Source: Royal Society of Chemistry journal article supplement (doi:10.1039/c3ra45268a), 2013-11-06
Supplement: c3ra45268a.pdf [file c3ra45268a.pdf]

## Supporting Information

### Self-assembly of hierarchical Fe<sub>3</sub>O<sub>4</sub> microsphere/ graphene nanosheet composite: towards a promising high-performance anode for Li-ion batteries

Ting-qiang Wang, Xiu-li Wang\*, Yi Lu, Qin-qin Xiong, Xu-yang Zhao, Jian-bin

Cai, Sen Huang, Chang-dong Gu and Jiang-ping Tu\*

*State Key Laboratory of Silicon Materials, Key Laboratory of Advanced Materials and  
Applications for Batteries of Zhejiang Province, and Department of Materials Science and  
Engineering, Zhejiang University, Hangzhou 310027, China.*

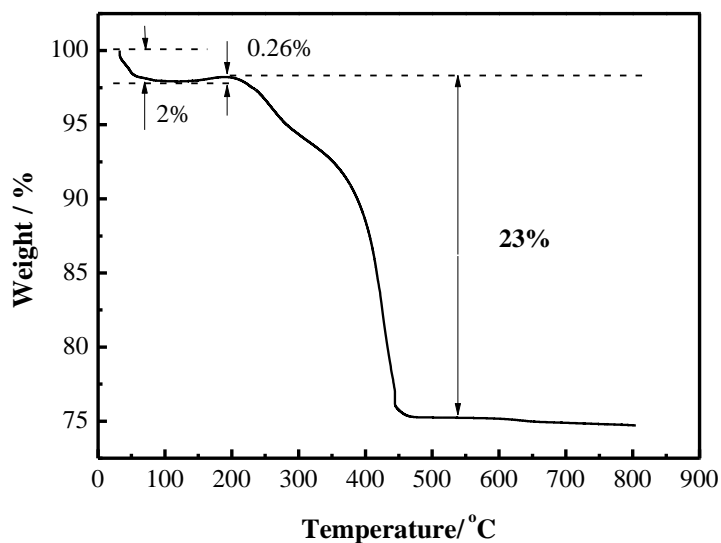

**Fig. S1** TG plot of the H-Fe<sub>3</sub>O<sub>4</sub>-MS/GNS composite.

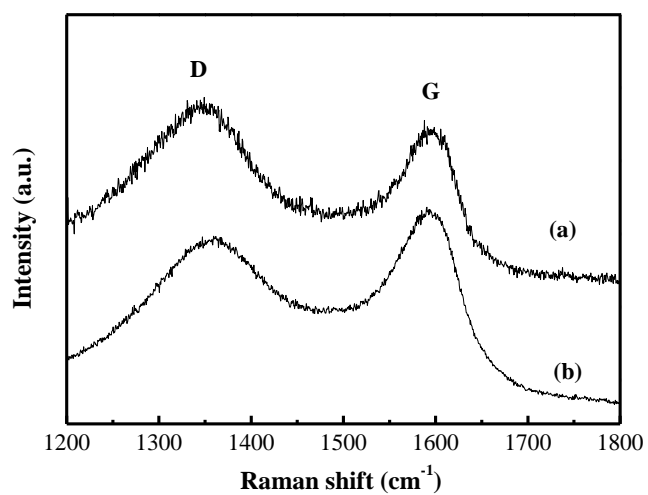

**Fig. S2** Raman spectra of (a) H-Fe<sub>3</sub>O<sub>4</sub>-MS/GNS composite, and (b) GO.
